# Supplementary material
Source: publisher figshare collection journal article supplement (https://rs.figshare.com/ndownloader/files/12601823)

**Appendix S1.** Satellite tracks of tagged adult northern elephant seals included in study. Black tracks signify the 29 seals used in the fat gain analysis; gray tracks signify the remaining 113 seals (for a total N=142).


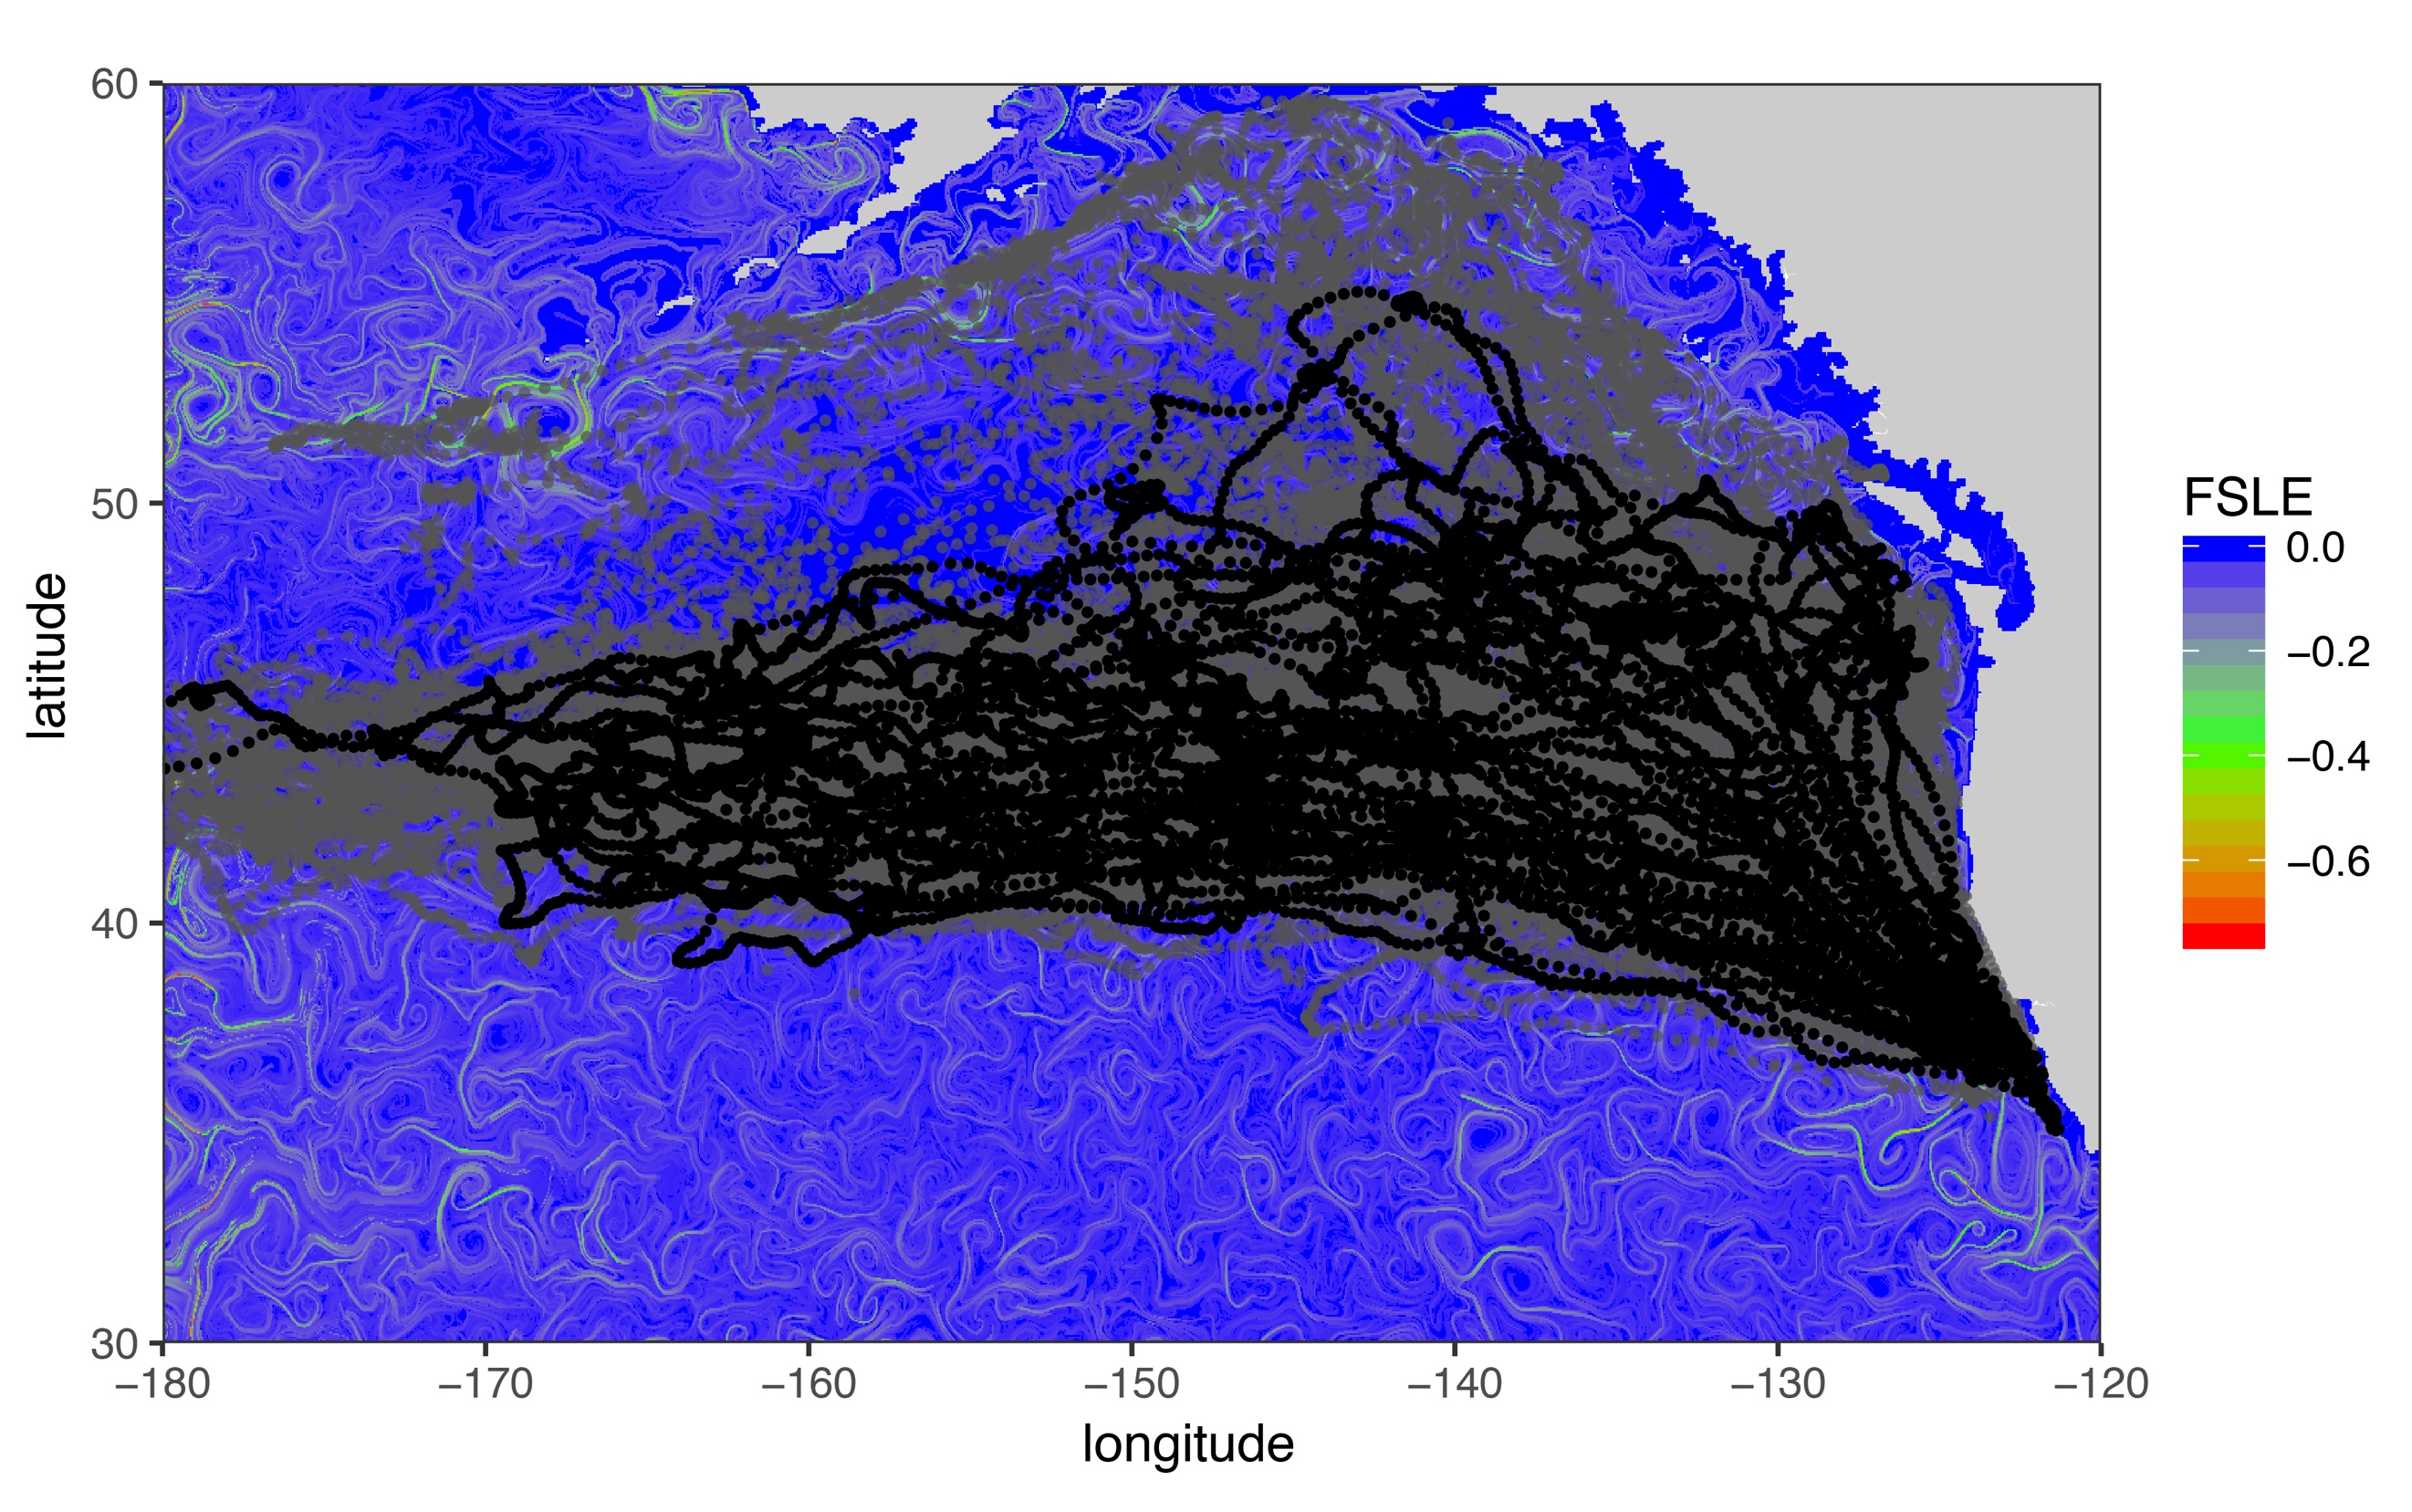

Supplement: Supplementary file 1 [file 12601823]
